# Supplementary material for: Synthesis of Magnetic Adsorbents Based Carbon Highly Efficient and Stable for Use in the Removal of Pb(II) and Cd(II) in Aqueous Solution
Source: MDPI journal article supplement (doi:10.3390/ma14206134), 2021-10-15
Supplement: s1 [file s1]

# Synthesis of Magnetic Adsorbents Based Carbon Highly Efficient and Stable for Use in the Removal of Pb(II) and Cd(II) in Aqueous Solution

Safa Benjedim <sup>1</sup>, Luis A. Romero-Cano <sup>2,\*</sup>, Hesham Hamad <sup>1,3</sup>, Esther Bailón-García <sup>1</sup>, Václav Slovák <sup>4</sup>,  
Francisco Carrasco-Marín <sup>1</sup> and Agustín F. Pérez-Cadenas <sup>1,\*</sup>

**Citation:** Benjedim, S.; Romero-Cano, L.A.; Hamad, H.; Bailón-García, E.; Slovák, V.; Carrasco-Marín, F.; Pérez-Cadenas, A.F. Synthesis of Magnetic Adsorbents Based Carbon Highly Efficient and Stables for Its Use in the Removal of Pb(II) and Cd(II) in Aqueous Solution. *Materials* **2021**, *14*, 6134. <https://doi.org/10.3390/ma14206134>

Academic Editor: Pasquale  
Fernando Fulvio

Received: 15 August 2021  
Accepted: 12 October 2021  
Published: date

**Publisher's Note:** MDPI stays neutral with regard to jurisdictional claims in published maps and institutional affiliations.

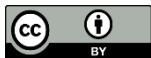

**Copyright:** © 2021 by the authors. Submitted for possible open access publication under the terms and conditions of the Creative Commons Attribution (CC BY) license (<http://creativecommons.org/licenses/by/4.0/>).

- <sup>1</sup> Carbon Materials Research Group, Department of Inorganic Chemistry, Faculty of Sciences, University of Granada, Av. Fuente Nueva s/n., 18071 Granada, Spain; safabenj@correo.ugr.es (S.B.); heshamaterials@hotmail.com (H.H.); estherbg@ugr.es (E.B.-G.); fmarin@ugr.es (F.C.-M.)
  - <sup>2</sup> Grupo de Investigación en Materiales y Fenómenos de Superficie, Departamento de Ciencias Biotecnológicas y Ambientales, Universidad Autónoma de Guadalajara, Av. Patria 1201, 45129 Zapopan, Mexico
  - <sup>3</sup> Fabrication Technology Research Department, Advanced Technology and New Materials Research Institute (ATNMRI), City of Scientific Research and Technology Application (SRTA-City), Alexandria 21934, Egypt
  - <sup>4</sup> Department of Chemistry, Faculty of Science, University of Ostrava, 30, dubna 22, 702 00 Ostrava, Czech Republic; vaclav.slovak@osu.cz
- \* Correspondence: luis.cano@edu.uag.mx (L.A.R.-C.); afperez@ugr.es (A.F.P.-C.)

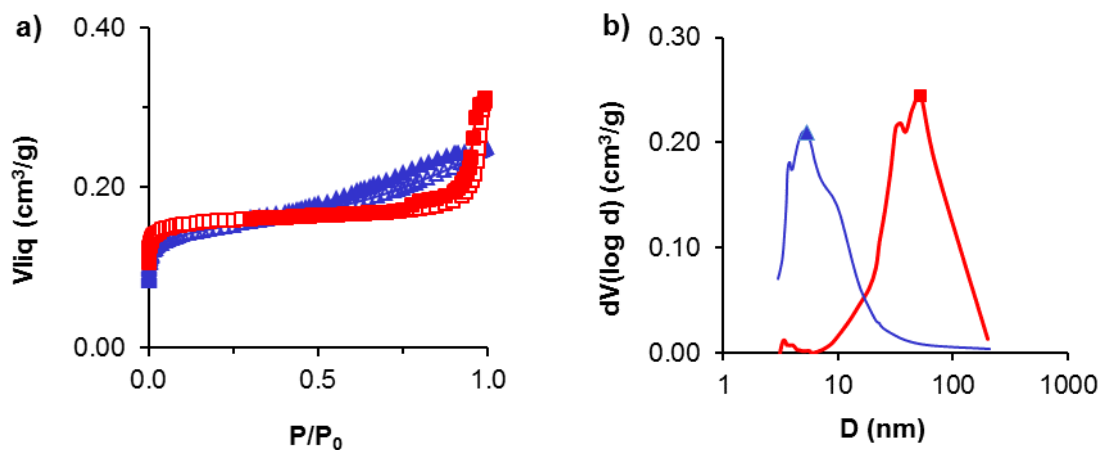

**Figure S1.** a) Nitrogen isotherms at -196 °C, adsorption-open symbols; desorption-closed symbols. (b) BJH pore size distribution obtained from  $N_2$  desorption isotherms. Samples: ■  $Fe_3O_4+C$ , and ▲  $CoFe_2O_4+C$ .

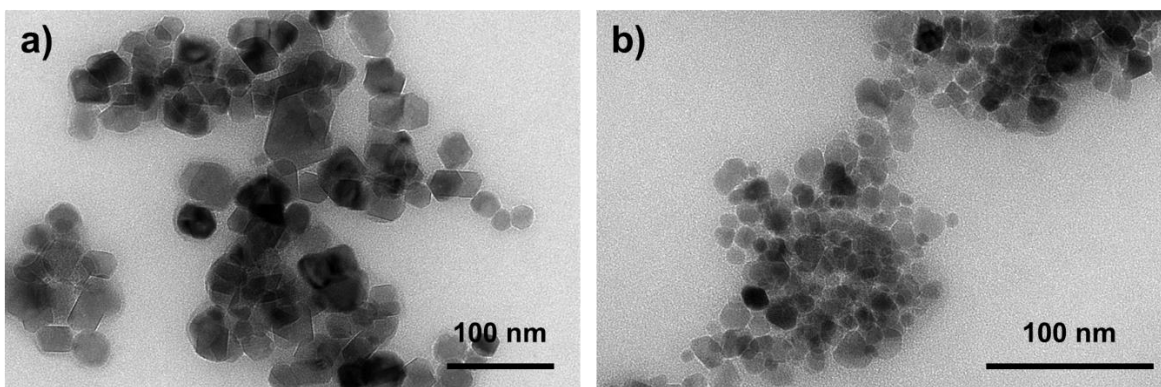

**Figure S2.** TEM images. Samples: a)  $Fe_3O_4+C$ , and c)  $CoFe_2O_4+C$

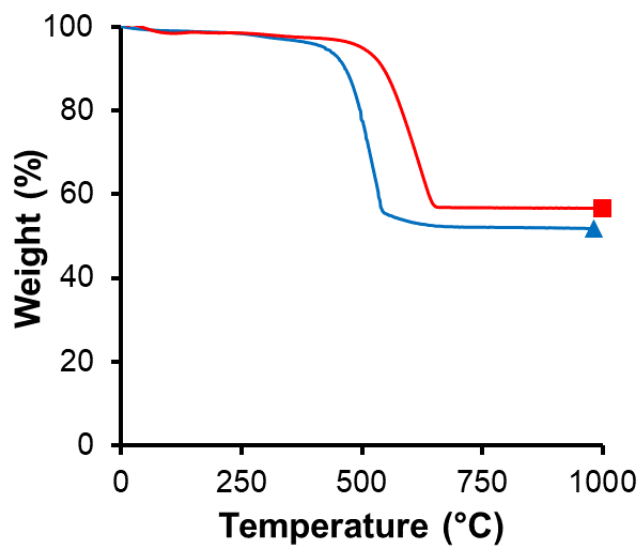

**Figure S3.** TGA curves in air. Samples: ■  $Fe_3O_4+C$ , and ▲  $CoFe_2O_4+C$ .

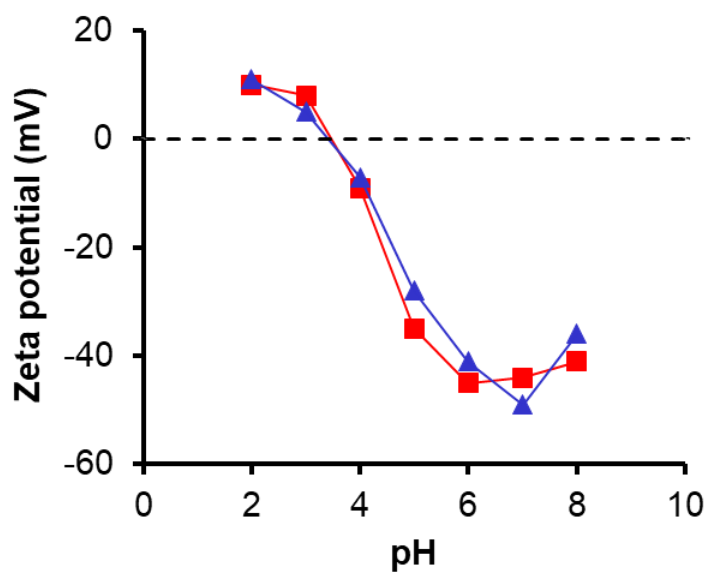

**Figure S4.** Zeta potentials of ■  $Fe_3O_4+C$ , and ▲  $CoFe_2O_4+C$  as a function of pH

**Table S1. Analysis of variance (ANOVA). Factor: Contact time****Adsorption of Pb(II) onto C**

| Effect       | SS       | Degr. of Freedom | MS       | F        | p        |
|--------------|----------|------------------|----------|----------|----------|
| Intercept    | 539349.2 | 1                | 539349.2 | 8256.372 | 0.000000 |
| Contact time | 119520.9 | 5                | 23904.2  | 365.926  | 0.000000 |
| Error        | 392.0    | 6                | 65.3     |          |          |

**Adsorption of Pb(II) onto  $Fe_3O_4$ +C**

| Effect       | SS      | Degr. of Freedom | MS      | F        | p        |
|--------------|---------|------------------|---------|----------|----------|
| Intercept    | 1504960 | 1                | 1504960 | 8370.938 | 0.000000 |
| Contact time | 308341  | 5                | 61668   | 343.012  | 0.000000 |
| Error        | 1079    | 6                | 180     |          |          |

**Adsorption of Pb(II) onto  $CoFe_2O_4$ +C.**

| Effect       | SS       | Degr. of Freedom | MS       | F        | p        |
|--------------|----------|------------------|----------|----------|----------|
| Intercept    | 374499.9 | 1                | 374499.9 | 6563.955 | 0.000000 |
| Contact time | 105039.0 | 4                | 26259.7  | 460.261  | 0.000001 |
| Error        | 285.3    | 5                | 57.1     |          |          |

**Adsorption of Cd(II) onto C**

| Effect       | SS       | Degr. of Freedom | MS       | F        | p        |
|--------------|----------|------------------|----------|----------|----------|
| Intercept    | 37169.75 | 1                | 37169.75 | 6437.876 | 0.000000 |
| Contact time | 11357.40 | 4                | 2839.35  | 491.781  | 0.000001 |
| Error        | 28.87    | 5                | 5.77     |          |          |

**Adsorption of Cd(II) onto  $Fe_3O_4$ +C**

| Effect       | SS       | Degr. of Freedom | MS       | F        | p        |
|--------------|----------|------------------|----------|----------|----------|
| Intercept    | 172134.4 | 1                | 172134.4 | 6567.728 | 0.000000 |
| Contact time | 48153.3  | 4                | 12038.3  | 459.318  | 0.000001 |
| Error        | 131.0    | 5                | 26.2     |          |          |

**Adsorption of Cd(II) onto  $CoFe_2O_4$ +C.**

| Effect       | SS       | Degr. of Freedom | MS       | F        | p        |
|--------------|----------|------------------|----------|----------|----------|
| Intercept    | 29512.06 | 1                | 29512.06 | 6415.316 | 0.000000 |
| Contact time | 9153.05  | 4                | 2288.26  | 497.421  | 0.000001 |
| Error        | 23.00    | 5                | 4.60     |          |          |

**Table S2.** Analysis of variance (ANOVA). Factor: Initial concentration of metal**Adsorption of Pb(II) onto C**

| Effect               | SS       | Degr. of Freedom | MS       | F        | p        |
|----------------------|----------|------------------|----------|----------|----------|
| Intercept            | 11532816 | 1                | 11532816 | 21736.59 | 0.000000 |
| metal concentrations | 2774110  | 15               | 184941   | 348.57   | 0.000000 |
| Error                | 7428     | 14               | 531      |          |          |

**Adsorption of Pb(II) onto  $Fe_3O_4+C$** 

| Effect               | SS       | Degr. of Freedom | MS       | F        | p        |
|----------------------|----------|------------------|----------|----------|----------|
| Intercept            | 547677.1 | 1                | 547677.1 | 14814.60 | 0.000000 |
| metal concentrations | 213985.5 | 11               | 19453.2  | 526.21   | 0.000000 |
| Error                | 443.6    | 12               | 37.0     |          |          |

**Adsorption of Pb(II) onto  $CoFe_2O_4+C$ .**

| Effect               | SS       | Degr. of Freedom | MS       | F        | p        |
|----------------------|----------|------------------|----------|----------|----------|
| Intercept            | 104500.7 | 1                | 104500.7 | 12774.28 | 0.000000 |
| metal concentrations | 22682.9  | 8                | 2835.4   | 346.60   | 0.000000 |
| Error                | 73.6     | 9                | 8.2      |          |          |

**Adsorption of Cd(II) onto C**

| Effect               | SS       | Degr. of Freedom | MS       | F        | p        |
|----------------------|----------|------------------|----------|----------|----------|
| Intercept            | 185308.7 | 1                | 185308.7 | 13819.63 | 0.000000 |
| metal concentrations | 83094.9  | 11               | 7554.1   | 563.36   | 0.000000 |
| Error                | 147.5    | 11               | 13.4     |          |          |

**Adsorption of Cd(II) onto  $Fe_3O_4+C$** 

| Effect               | SS       | Degr. of Freedom | MS       | F        | p        |
|----------------------|----------|------------------|----------|----------|----------|
| Intercept            | 126564.0 | 1                | 126564.0 | 11053.63 | 0.000000 |
| metal concentrations | 44060.4  | 9                | 4895.6   | 427.56   | 0.000000 |
| Error                | 114.5    | 10               | 11.4     |          |          |

**Adsorption of Cd(II) onto  $CoFe_2O_4+C$ .**

| Effect               | SS       | Degr. of Freedom | MS       | F        | p        |
|----------------------|----------|------------------|----------|----------|----------|
| Intercept            | 43440.33 | 1                | 43440.33 | 6683.128 | 0.000000 |
| metal concentrations | 18020.67 | 5                | 3604.13  | 554.482  | 0.000000 |
| Error                | 39.00    | 6                | 6.50     |          |          |

**Table S3. Analysis of variance (ANOVA). Factor: pH****Adsorption of Pb(II) onto C**

| Effect    | SS      | Degr. of Freedom | MS      | F        | p        |
|-----------|---------|------------------|---------|----------|----------|
| Intercept | 1132740 | 1                | 1132740 | 6356.205 | 0.000000 |
| pH        | 65545   | 3                | 21848   | 122.598  | 0.000216 |
| Error     | 713     | 4                | 178     |          |          |

**Adsorption of Pb(II) onto  $Fe_3O_4$ +C**

| Effect    | SS      | Degr. of Freedom | MS      | F        | p        |
|-----------|---------|------------------|---------|----------|----------|
| Intercept | 1077730 | 1                | 1077730 | 5427.324 | 0.000000 |
| pH        | 257487  | 3                | 85829   | 432.225  | 0.000018 |
| Error     | 794     | 4                | 199     |          |          |

**Adsorption of Pb(II) onto  $CoFe_2O_4$ +C.**

| Effect    | SS      | Degr. of Freedom | MS      | F        | p        |
|-----------|---------|------------------|---------|----------|----------|
| Intercept | 1029613 | 1                | 1029613 | 5385.355 | 0.000000 |
| pH        | 255932  | 3                | 85311   | 446.215  | 0.000017 |
| Error     | 765     | 4                | 191     |          |          |

**Adsorption of Cd(II) onto C**

| Effect    | SS       | Degr. of Freedom | MS       | F        | p        |
|-----------|----------|------------------|----------|----------|----------|
| Intercept | 403637.0 | 1                | 403637.0 | 6216.254 | 0.000000 |
| pH        | 32969.2  | 3                | 10989.7  | 169.249  | 0.000114 |
| Error     | 259.7    | 4                | 64.9     |          |          |

**Adsorption of Cd(II) onto  $Fe_3O_4$ +C**

| Effect    | SS       | Degr. of Freedom | MS       | F        | p        |
|-----------|----------|------------------|----------|----------|----------|
| Intercept | 392456.0 | 1                | 392456.0 | 5512.909 | 0.000000 |
| pH        | 86215.8  | 3                | 28738.6  | 403.697  | 0.000020 |
| Error     | 284.8    | 4                | 71.2     |          |          |

**Adsorption of Cd(II) onto  $CoFe_2O_4$ +C.**

| Effect    | SS       | Degr. of Freedom | MS       | F        | p        |
|-----------|----------|------------------|----------|----------|----------|
| Intercept | 361887.8 | 1                | 361887.8 | 5459.882 | 0.000000 |
| pH        | 83787.3  | 3                | 27929.1  | 421.373  | 0.000019 |
| Error     | 265.1    | 4                | 66.3     |          |          |

**Table S4. Analysis of variance (ANOVA). Factor: reuse cycle****Adsorption of Pb(II) onto C**

| Effect    | SS       | Degr. of Freedom | MS       | F        | p        |
|-----------|----------|------------------|----------|----------|----------|
| Intercept | 349854.3 | 1                | 349854.3 | 4528.536 | 0.000000 |
| cycle     | 169611.6 | 3                | 56537.2  | 731.821  | 0.000006 |
| Error     | 309.0    | 4                | 77.3     |          |          |

**Adsorption of Pb(II) onto  $Fe_3O_4$ +C**

| Effect    | SS       | Degr. of Freedom | MS       | F        | p        |
|-----------|----------|------------------|----------|----------|----------|
| Intercept | 432081.1 | 1                | 432081.1 | 5728.037 | 0.000000 |
| cycle     | 75128.1  | 3                | 25042.7  | 331.988  | 0.000030 |
| Error     | 301.7    | 4                | 75.4     |          |          |

**Adsorption of Pb(II) onto  $CoFe_2O_4$ +C.**

| Effect    | SS       | Degr. of Freedom | MS       | F        | p        |
|-----------|----------|------------------|----------|----------|----------|
| Intercept | 297042.6 | 1                | 297042.6 | 6491.252 | 0.000000 |
| cycle     | 10650.7  | 3                | 3550.2   | 77.583   | 0.000532 |
| Error     | 183.0    | 4                | 45.8     |          |          |

**Adsorption of Cd(II) onto C**

| Effect    | SS       | Degr. of Freedom | MS       | F        | p        |
|-----------|----------|------------------|----------|----------|----------|
| Intercept | 565580.5 | 1                | 565580.5 | 6721.743 | 0.000000 |
| cycle     | 189.9    | 3                | 63.3     | 0.752    | 0.575537 |
| Error     | 336.6    | 4                | 84.1     |          |          |

**Adsorption of Cd(II) onto  $Fe_3O_4$ +C**

| Effect    | SS       | Degr. of Freedom | MS       | F        | p        |
|-----------|----------|------------------|----------|----------|----------|
| Intercept | 588282.7 | 1                | 588282.7 | 6723.288 | 0.000000 |
| cycle     | 62.3     | 3                | 20.8     | 0.237    | 0.866447 |
| Error     | 350.0    | 4                | 87.5     |          |          |

**Adsorption of Cd(II) onto  $CoFe_2O_4$ +C.**

| Effect    | SS       | Degr. of Freedom | MS       | F        | p        |
|-----------|----------|------------------|----------|----------|----------|
| Intercept | 453659.1 | 1                | 453659.1 | 6480.564 | 0.000000 |
| cycle     | 17041.3  | 3                | 5680.4   | 81.145   | 0.000487 |
| Error     | 280.0    | 4                | 70.0     |          |          |
